# Supplementary material
Source: PubMed Central journal article supplement (PMC7678592)
Supplement: 12603_2020_1532_MOESM1_ESM.pdf [file 12603_2020_1532_MOESM1_ESM.pdf]

**The impact of frailty on the relationship between life-space mobility and quality of life in older adults during the COVID-19 pandemic**

This supplementary material for online-only contains:

Figure:

**Supplementary Figure 1. Schematic of study design.**

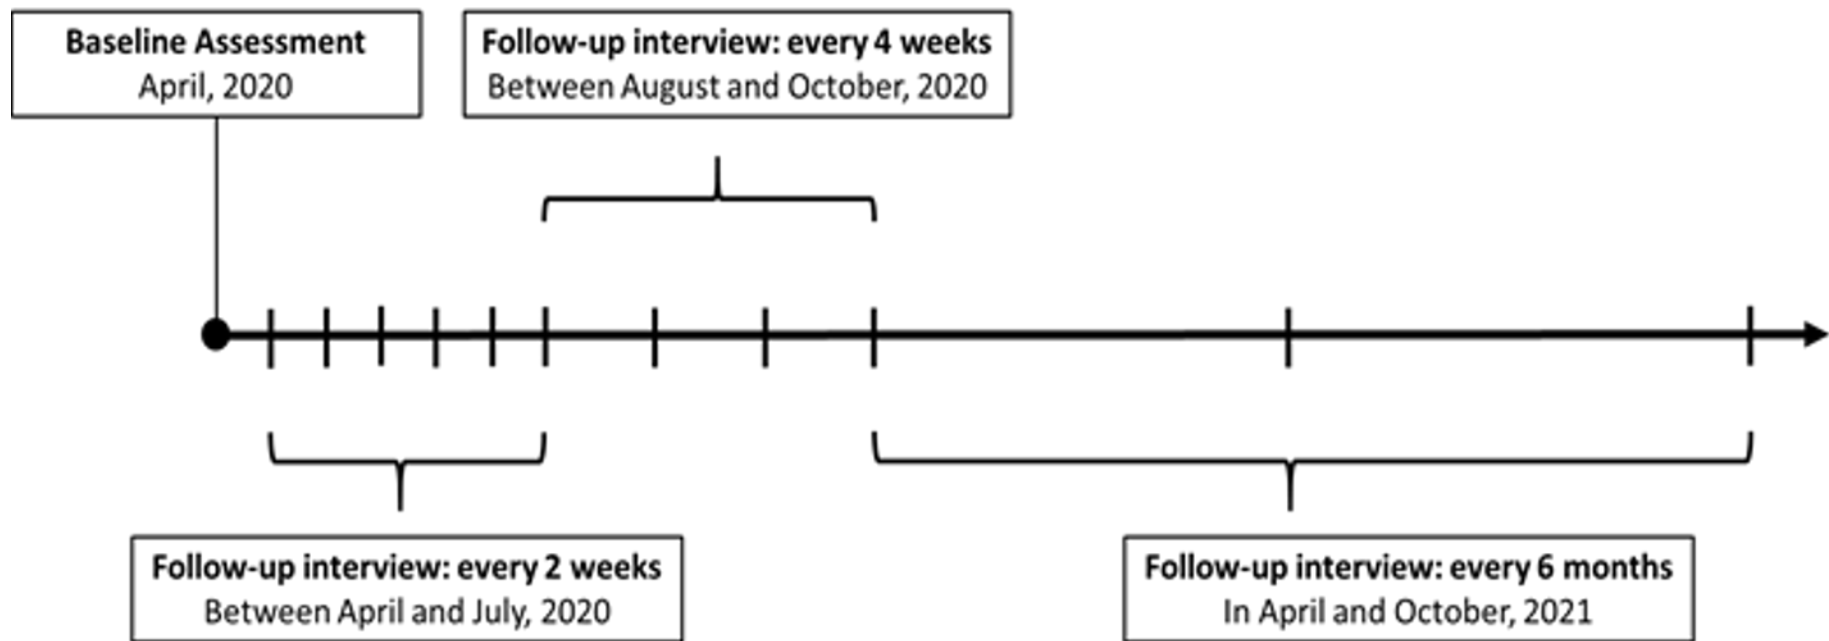

**Supplementary Figure 1. Schematic of study design.**

Participants underwent a comprehensive baseline assessment by telephone in April 2020. Follow-up interviews about a wide range of information on health and social circumstances is happening every 2-4 weeks during six months and semi-annually for an additional year (up to October 2021).
